# Supplementary material for: Single-Center Experience Implementing the LOINC-RSNA Radiology Playbook for Adult Abdomen/Pelvis CT and MR Procedures Using a Semi-Automated Method
Source: Springer Nature journal article supplement (doi:10.1007/s10278-017-0016-0), 2017-08-25
Supplement: 10278_2017_16_MOESM1_ESM.pdf [file 10278_2017_16_MOESM1_ESM.pdf]

| Original Procedure Name                                          | Modified Local Procedure Name, Token Sort Ratios                              | LOINC-RSNA Radiology Playbook Procedure Names                                               | LOINC # | RPID #   | Rank | Category |
|------------------------------------------------------------------|-------------------------------------------------------------------------------|---------------------------------------------------------------------------------------------|---------|----------|------|----------|
| 3D RECONSTRUCTION ON SEPARATE WORKSTATION CT                     | 3D RECONSTRUCTION ON SEPARATE WORKSTATION CT                                  | 53 PELVIS CT BY RECONSTRUCTION WO CONTRAST                                                  | 79076-6 | RPID161  |      | 0        |
|                                                                  |                                                                               | 49 PELVIS CT BY RECONSTRUCTION W CONTRAST IV                                                | 79075-8 | RPID156  |      |          |
|                                                                  |                                                                               | 47 COLON AND RECTUM CT FOR SCREENING                                                        | 79101-2 | RPID86   |      |          |
|                                                                  |                                                                               | 43 COLON AND RECTUM CT FOR SCREENING WO CONTRAST                                            | 79069-1 | RPID148  |      |          |
|                                                                  |                                                                               | 38 PELVIS CT 3D POST PROCESSING WO CONTRAST                                                 | 79099-8 | RPID1278 |      |          |
| CT ABDOMEN AND PELVIS W CONTRAST                                 | CT ABDOMEN AND PELVIS W CONTRAST                                              | 98 ABDOMEN AND PELVIS CT WO CONTRAST                                                        | 36952-0 | RPID144  |      | 2        |
|                                                                  |                                                                               | 96 ABDOMEN AND PELVIS CT W CONTRAST IV                                                      | 36813-4 | RPID145  |      |          |
|                                                                  |                                                                               | 86 ABDOMEN CT WO AND W CONTRAST IV                                                          | 36267-3 | RPID4    |      |          |
|                                                                  |                                                                               | 85 ABDOMEN AND PELVIS CT WO AND W CONTRAST IV                                               | 42274-1 | RPID198  |      |          |
|                                                                  |                                                                               | 85 CHEST AND ABDOMEN AND PELVIS CT WO CONTRAST                                              | 72253-8 |          |      |          |
| CT ABDOMEN AND PELVIS WITH + WITHOUT IV CONTRAST                 | CT ABDOMEN AND PELVIS W AND WO IV CONTRAST                                    | 100 ABDOMEN AND PELVIS CT WO AND W CONTRAST IV                                              | 42274-1 | RPID198  |      | 1        |
|                                                                  |                                                                               | 91 ABDOMEN AND PELVIS CT W CONTRAST IV                                                      | 36813-4 | RPID145  |      |          |
|                                                                  |                                                                               | 90 CHEST AND ABDOMEN AND PELVIS CT W CONTRAST IV                                            | 72254-6 |          |      |          |
|                                                                  |                                                                               | 89 CHEST AND ABDOMEN AND PELVIS CT WO AND W CONTRAST IV                                     | 72252-0 |          |      |          |
|                                                                  |                                                                               | 88 ABDOMEN AND PELVIS CT WO CONTRAST                                                        | 36952-0 | RPID144  |      |          |
| CT ABDOMEN AND PELVIS WITHOUT IV CONTRAST                        | CT ABDOMEN AND PELVIS WO IV CONTRAST                                          | 99 ABDOMEN AND PELVIS CT W CONTRAST IV                                                      | 36813-4 | RPID145  |      | 2        |
|                                                                  |                                                                               | 96 ABDOMEN AND PELVIS CT WO CONTRAST                                                        | 36952-0 | RPID144  |      |          |
|                                                                  |                                                                               | 92 ABDOMEN AND PELVIS CT WO AND W CONTRAST IV                                               | 42274-1 | RPID198  |      |          |
|                                                                  |                                                                               | 90 ABDOMEN CT WO AND W CONTRAST IV                                                          | 36267-3 | RPID4    |      |          |
|                                                                  |                                                                               | 86 CHEST AND ABDOMEN AND PELVIS CT W CONTRAST IV                                            | 72254-6 |          |      |          |
| CT ABDOMEN PELVIS W-WO CONTRAST + MIP UROGRAM                    | CT ABDOMEN PELVIS W-WO CONTRAST AND MIP KIDNEY AND URETER AND URINARY BLADDER | 84 KIDNEY AND URETER AND URINARY BLADDER CT 3D POST PROCESSING WO AND W CONTRAST IV         | 79074-1 | RPID6007 |      | 2        |
|                                                                  |                                                                               | 73 CHEST AND ABDOMEN AND PELVIS CT WO AND W CONTRAST IV                                     | 72252-0 |          |      |          |
|                                                                  |                                                                               | 69 ABDOMEN AND PELVIS CT WO AND W CONTRAST IV                                               | 42274-1 | RPID198  |      |          |
|                                                                  |                                                                               | 66 CHEST AND ABDOMEN AND PELVIS CT W CONTRAST IV                                            | 72254-6 |          |      |          |
|                                                                  |                                                                               | 65 CHEST AND ABDOMEN AND PELVIS CT WO CONTRAST                                              | 72253-8 |          |      |          |
| CT ABDOMEN WITH + WITHOUT IV CONTRAST                            | CT ABDOMEN W AND WO IV CONTRAST                                               | 100 ABDOMEN CT WO AND W CONTRAST IV                                                         | 36267-3 | RPID4    |      | 1        |
|                                                                  |                                                                               | 89 ABDOMEN CT LIMITED WO AND W CONTRAST IV                                                  | 36102-2 |          |      |          |
|                                                                  |                                                                               | 88 ABDOMEN AND PELVIS CT WO CONTRAST IV                                                     | 36952-0 | RPID144  |      |          |
|                                                                  |                                                                               | 88 ABDOMEN AND PELVIS CT W CONTRAST IV                                                      | 36813-4 | RPID145  |      |          |
|                                                                  |                                                                               | 87 ABDOMEN CT W CONTRAST IV                                                                 | 79103-8 | RPID5    |      |          |
| CT ABDOMEN WITH IV CONTRAST                                      | CT ABDOMEN W IV CONTRAST                                                      | 100 ABDOMEN CT W CONTRAST IV                                                                | 79103-8 | RPID5    |      | 1        |
|                                                                  |                                                                               | 91 ABDOMEN CT WO CONTRAST                                                                   | 36424-0 | RPID3    |      |          |
|                                                                  |                                                                               | 87 ABDOMEN CT WO AND W CONTRAST IV                                                          | 36267-3 | RPID4    |      |          |
|                                                                  |                                                                               | 86 ABDOMEN CT LIMITED W CONTRAST IV                                                         | 36958-8 |          |      |          |
|                                                                  |                                                                               | 85 ABDOMEN CT LIMITED WO CONTRAST                                                           | 36103-0 |          |      |          |
| CT ABDOMEN WITHOUT IV CONTRAST                                   | CT ABDOMEN WO IV CONTRAST                                                     | 98 ABDOMEN CT W CONTRAST IV                                                                 | 79103-8 | RPID5    |      | 2        |
|                                                                  |                                                                               | 94 ABDOMEN CT WO CONTRAST                                                                   | 36424-0 | RPID3    |      |          |
|                                                                  |                                                                               | 89 ABDOMEN CT WO AND W CONTRAST IV                                                          | 36267-3 | RPID4    |      |          |
|                                                                  |                                                                               | 87 ABDOMEN CT LIMITED WO CONTRAST                                                           | 36103-0 |          |      |          |
|                                                                  |                                                                               | 84 ABDOMEN CT LIMITED W CONTRAST IV                                                         | 36958-8 |          |      |          |
| CT ANGIOGRAPHY ABDOMEN AND PELVIS WITH + WITHOUT IV CONTRAST     | CT VESSELS ANGIOGRAM ABDOMEN AND PELVIS W AND WO IV CONTRAST                  | 90 ABDOMINAL AND PELVIC VESSELS CT ANGIOGRAM W CONTRAST IV                                  | 69908-2 |          |      | 0        |
|                                                                  |                                                                               | 89 PELVIS VESSELS CT ANGIOGRAM WO AND W CONTRAST IV                                         | 30623-3 | RPID12   |      |          |
|                                                                  |                                                                               | 88 ABDOMINAL VESSELS CT ANGIOGRAM WO AND W CONTRAST IV                                      | 30805-6 | RPID2    |      |          |
|                                                                  |                                                                               | 82 ABDOMEN AND PELVIS CT WO AND W CONTRAST IV                                               | 42274-1 | RPID198  |      |          |
|                                                                  |                                                                               | 81 PELVIS VESSELS CT ANGIOGRAM W CONTRAST IV                                                | 42294-9 |          |      |          |
| CT ANGIOGRAPHY ABDOMEN AND PELVIS WITH IV CONTRAST               | CT VESSELS ANGIOGRAM ABDOMEN AND PELVIS W IV CONTRAST                         | 94 ABDOMINAL AND PELVIC VESSELS CT ANGIOGRAM W CONTRAST IV                                  | 69908-2 |          |      | 1        |
|                                                                  |                                                                               | 89 PELVIS VESSELS CT ANGIOGRAM WO AND W CONTRAST IV                                         | 30623-3 | RPID12   |      |          |
|                                                                  |                                                                               | 87 PELVIS VESSELS CT ANGIOGRAM W CONTRAST IV                                                | 42294-9 |          |      |          |
|                                                                  |                                                                               | 87 ABDOMINAL VESSELS CT ANGIOGRAM WO AND W CONTRAST IV                                      | 30805-6 | RPID2    |      |          |
|                                                                  |                                                                               | 87 ABDOMINAL VESSELS CT ANGIOGRAM W CONTRAST IV                                             | 36828-2 |          |      |          |
| CT ANGIOGRAPHY ABDOMEN WITH + WITHOUT IV CONTRAST                | CT VESSELS ANGIOGRAM ABDOMEN W AND WO IV CONTRAST                             | 96 ABDOMINAL VESSELS CT ANGIOGRAM WO AND W CONTRAST IV                                      | 30805-6 | RPID2    |      | 1        |
|                                                                  |                                                                               | 90 ABDOMINAL VESSELS CT ANGIOGRAM W CONTRAST IV                                             | 36828-2 |          |      |          |
|                                                                  |                                                                               | 87 ABDOMINAL AND PELVIC VESSELS CT ANGIOGRAM W CONTRAST IV                                  | 69908-2 |          |      |          |
|                                                                  |                                                                               | 85 PELVIS VESSELS CT ANGIOGRAM WO AND W CONTRAST IV                                         | 30623-3 | RPID12   |      |          |
|                                                                  |                                                                               | 84 ABDOMEN AND PELVIS CT WO AND W CONTRAST IV                                               | 42274-1 | RPID198  |      |          |
| CT ANGIOGRAPHY ABDOMEN WITH IV CONTRAST                          | CT VESSELS ANGIOGRAM ABDOMEN W IV CONTRAST                                    | 95 ABDOMINAL VESSELS CT ANGIOGRAM W CONTRAST IV                                             | 36828-2 |          |      | 1        |
|                                                                  |                                                                               | 88 ABDOMINAL VESSELS CT ANGIOGRAM WO AND W CONTRAST IV                                      | 30805-6 | RPID2    |      |          |
|                                                                  |                                                                               | 85 ABDOMINAL AND PELVIC VESSELS CT ANGIOGRAM W CONTRAST IV                                  | 69908-2 |          |      |          |
|                                                                  |                                                                               | 83 RENAL VESSELS CT ANGIOGRAM W CONTRAST IV                                                 | 36833-2 |          |      |          |
|                                                                  |                                                                               | 82 PELVIS VESSELS CT ANGIOGRAM WO AND W CONTRAST IV                                         | 30623-3 | RPID12   |      |          |
| CT ANGIOGRAPHY PELVIS WITH + WITHOUT IV CONTRAST                 | CT VESSELS ANGIOGRAM PELVIS W AND WO IV CONTRAST                              | 100 PELVIS VESSELS CT ANGIOGRAM WO AND W CONTRAST IV                                        | 30623-3 | RPID12   |      | 1        |
|                                                                  |                                                                               | 92 PELVIS VESSELS CT ANGIOGRAM W CONTRAST IV                                                | 42294-9 |          |      |          |
|                                                                  |                                                                               | 85 ABDOMINAL AND PELVIC VESSELS CT ANGIOGRAM W CONTRAST IV                                  | 69908-2 |          |      |          |
|                                                                  |                                                                               | 84 RENAL VESSELS CT ANGIOGRAM W CONTRAST IV                                                 | 36833-2 |          |      |          |
|                                                                  |                                                                               | 83 ABDOMINAL VESSELS CT ANGIOGRAM WO AND W CONTRAST IV                                      | 30805-6 | RPID2    |      |          |
| CT ANGIOGRAPHY PELVIS WITH IV CONTRAST                           | CT VESSELS ANGIOGRAM PELVIS W IV CONTRAST                                     | 100 PELVIS VESSELS CT ANGIOGRAM WO AND W CONTRAST IV                                        | 42294-9 |          |      | 1        |
|                                                                  |                                                                               | 92 PELVIS VESSELS CT ANGIOGRAM W AND W CONTRAST IV                                          | 30623-3 | RPID12   |      |          |
|                                                                  |                                                                               | 91 RENAL VESSELS CT ANGIOGRAM W CONTRAST IV                                                 | 36833-2 |          |      |          |
|                                                                  |                                                                               | 83 ABDOMINAL AND PELVIC VESSELS CT ANGIOGRAM W CONTRAST IV                                  | 69908-2 |          |      |          |
|                                                                  |                                                                               | 80 ABDOMINAL VESSELS CT ANGIOGRAM W CONTRAST IV                                             | 36828-2 |          |      |          |
| CT ANGIOGRAPHY RUNOFF AORTA TO ANKLES WITH + WITHOUT IV CONTRAST | CT VESSELS ANGIOGRAM RUNOFF AORTA TO ANKLES W AND WO IV CONTRAST              | 76 ABDOMINAL AORTA AND BILATERAL RUNOFF VESSELS CT ANGIOGRAM WO AND W CONTRAST IV           | 78031-2 | RPID5995 |      | 1        |
|                                                                  |                                                                               | 76 ABDOMINAL AORTA AND BILATERAL RUNOFF VESSELS CT ANGIOGRAM W CONTRAST IV                  | 78037-9 |          |      |          |
|                                                                  |                                                                               | 75 PELVIS VESSELS CT ANGIOGRAM WO AND W CONTRAST IV                                         | 30623-3 | RPID12   |      |          |
|                                                                  |                                                                               | 74 THORACIC AND ABDOMINAL AORTA AND BILATERAL RUNOFF VESSELS CT ANGIOGRAM WO AND W CONTRAST | 78032-0 |          |      |          |
|                                                                  |                                                                               | 73 THORACIC AND ABDOMINAL AORTA AND BILATERAL RUNOFF VESSELS CT ANGIOGRAM W CONTRAST IV     | 78038-7 |          |      |          |
| CT ANGIOGRAPHY RUNOFF AORTA TO ANKLES WITH IV CONTRAST           | CT VESSELS ANGIOGRAM RUNOFF AORTA TO ANKLES W IV CONTRAST                     | 76 RENAL VESSELS CT ANGIOGRAM W CONTRAST IV                                                 | 36833-2 |          |      | 2        |
|                                                                  |                                                                               | 73 ABDOMINAL AORTA AND BILATERAL RUNOFF VESSELS CT ANGIOGRAM W CONTRAST IV                  | 78037-9 |          |      |          |
|                                                                  |                                                                               | 72 AORTA CT ANGIOGRAM W CONTRAST IV                                                         | 36141-0 |          |      |          |
|                                                                  |                                                                               | 71 THORACIC AND ABDOMINAL AORTA AND BILATERAL RUNOFF VESSELS CT ANGIOGRAM W CONTRAST IV     | 78038-7 |          |      |          |
|                                                                  |                                                                               | 71 PELVIS VESSELS CT ANGIOGRAM W CONTRAST IV                                                | 42294-9 |          |      |          |
| CT BODY SCREENING COMPLETE                                       | CT BODY SCREENING COMPLETE                                                    | 61 COLON AND RECTUM CT FOR SCREENING                                                        | 79101-2 | RPID86   |      | 0        |
|                                                                  |                                                                               | 54 COLON AND RECTUM CT FOR SCREENING WO CONTRAST                                            | 79069-1 | RPID148  |      |          |
|                                                                  |                                                                               | 49 PELVIS CT BY RECONSTRUCTION WO CONTRAST                                                  | 79076-6 | RPID161  |      |          |
|                                                                  |                                                                               | 48 PELVIS CT BY RECONSTRUCTION W CONTRAST IV                                                | 79075-8 | RPID156  |      |          |
|                                                                  |                                                                               | 48 ABDOMEN CT 3D POST PROCESSING WO CONTRAST                                                | 79066-7 | RPID5996 |      |          |
| CT CHEST ABDOMEN AND PELVIS WITH + WITHOUT IV CONTRAST           | CT CHEST ABDOMEN AND PELVIS W AND WO IV CONTRAST                              | 97 CHEST AND ABDOMEN AND PELVIS CT W CONTRAST IV                                            | 72254-6 |          |      | 2        |
|                                                                  |                                                                               | 96 CHEST AND ABDOMEN AND PELVIS CT WO AND W CONTRAST IV                                     | 72252-0 |          |      |          |
|                                                                  |                                                                               | 95 CHEST AND ABDOMEN AND PELVIS CT WO CONTRAST                                              | 72253-8 |          |      |          |
|                                                                  |                                                                               | 93 ABDOMEN AND PELVIS CT WO AND W CONTRAST IV                                               | 42274-1 | RPID198  |      |          |
|                                                                  |                                                                               | 92 CHEST AND ABDOMEN CT WO AND W CONTRAST IV                                                | 42277-4 |          |      |          |
| CT CHEST ABDOMEN AND PELVIS WITH IV CONTRAST                     | CT CHEST ABDOMEN AND PELVIS W IV CONTRAST                                     | 95 CHEST AND ABDOMEN AND PELVIS CT W CONTRAST IV                                            | 72254-6 |          |      | 1        |
|                                                                  |                                                                               | 92 ABDOMEN AND PELVIS CT W CONTRAST IV                                                      | 36813-4 | RPID145  |      |          |
|                                                                  |                                                                               | 91 CHEST AND ABDOMEN CT W CONTRAST IV                                                       | 42275-8 |          |      |          |
|                                                                  |                                                                               | 90 CHEST AND ABDOMEN AND PELVIS CT WO CONTRAST                                              | 72253-8 |          |      |          |
|                                                                  |                                                                               | 88 CHEST AND ABDOMEN AND PELVIS CT WO AND W CONTRAST IV                                     | 72252-0 |          |      |          |
| CT CHEST ABDOMEN AND PELVIS WITHOUT IV CONTRAST                  | CT CHEST ABDOMEN AND PELVIS WO IV CONTRAST                                    | 94 CHEST AND ABDOMEN AND PELVIS CT W CONTRAST IV                                            | 72254-6 |          |      | 2        |
|                                                                  |                                                                               | 92 CHEST AND ABDOMEN AND PELVIS CT WO CONTRAST                                              | 72253-8 |          |      |          |
|                                                                  |                                                                               | 91 ABDOMEN AND PELVIS CT W CONTRAST IV                                                      | 36813-4 | RPID145  |      |          |
|                                                                  |                                                                               | 89 CHEST AND ABDOMEN CT W CONTRAST IV                                                       | 42275-8 |          |      |          |
|                                                                  |                                                                               | 89 CHEST AND ABDOMEN AND PELVIS CT WO AND W CONTRAST IV                                     | 72252-0 |          |      |          |
| CT CHEST AND ABDOMEN WITH + WITHOUT IV CONTRAST - AO DISSECTION  | CT CHEST AND ABDOMEN W AND WO IV CONTRAST - AO DISSECTION                     | 85 CHEST AND ABDOMEN CT WO AND W CONTRAST IV                                                | 42277-4 |          |      | 1        |
|                                                                  |                                                                               | 80 CHEST AND ABDOMEN AND PELVIS CT WO CONTRAST                                              | 72253-8 |          |      |          |
|                                                                  |                                                                               | 80 CHEST AND ABDOMEN AND PELVIS CT WO AND W CONTRAST IV                                     | 72252-0 |          |      |          |
|                                                                  |                                                                               | 78 CHEST AND ABDOMEN AND PELVIS CT W CONTRAST IV                                            | 72254-6 |          |      |          |
|                                                                  |                                                                               | 76 CHEST AND ABDOMEN CT W CONTRAST IV                                                       | 42275-8 |          |      |          |
| CT LIMITED OR LOCALIZED FOLLOW UP - BODY                         | CT LIMITED OR LOCALIZED FOLLOW UP - BODY                                      | 49 PELVIS CT LIMITED W CONTRAST IV                                                          | 36998-2 |          |      | 0        |
|                                                                  |                                                                               | 47 CT GUIDANCE FOR NEEDLE BIOPSY OF LIVER                                                   | 69997-4 |          |      |          |
|                                                                  |                                                                               | 47 CT GUIDANCE FOR NEEDLE BIOPSY OF KIDNEY                                                  | 42289-9 |          |      |          |
|                                                                  |                                                                               | 46 CT GUIDANCE FOR NEEDLE BIOPSY OF PANCREAS                                                | 42290-7 |          |      |          |
|                                                                  |                                                                               | 46 CT GUIDANCE FOR BIOPSY OF SPLEEN                                                         | 30609-2 |          |      |          |
| CT LIVER ADVANCED WITH + WITHOUT IV CONTRAST                     | CT LIVER ADVANCED W AND WO IV CONTRAST                                        | 87 LIVER CT WO AND W CONTRAST IV                                                            | 30612-6 |          |      | 1        |
|                                                                  |                                                                               | 81 ABDOMEN CT LIMITED WO AND W CONTRAST IV                                                  | 36102-2 |          |      |          |
|                                                                  |                                                                               | 80 ABDOMEN AND PELVIS CT WO AND W CONTRAST IV                                               | 42274-1 | RPID198  |      |          |
|                                                                  |                                                                               | 78 ABDOMEN CT WO AND W CONTRAST IV                                                          | 36267-3 | RPID4    |      |          |
|                                                                  |                                                                               | 76 SPLEEN CT WO AND W CONTRAST IV                                                           | 24989-6 |          |      |          |
| CT LIVER ADVANCED + VOLUME WITH + WITHOUT IV CONTRAST            | CT LIVER ADVANCED AND VOLUME W AND WO IV CONTRAST                             | 76 ABDOMEN CT WO AND W REDUCED CONTRAST VOLUME IV                                           | 46318-2 |          |      | 3        |
|                                                                  |                                                                               | 75 ABDOMEN AND PELVIS CT WO AND W CONTRAST IV                                               | 42274-1 | RPID198  |      |          |
|                                                                  |                                                                               | 74 LIVER CT WO AND W CONTRAST IV                                                            | 30612-6 |          |      |          |
|                                                                  |                                                                               | 72 PELVIS CT WO AND W REDUCED CONTRAST VOLUME IV                                            | 46313-3 |          |      |          |
|                                                                  |                                                                               | 71 CHEST AND ABDOMEN AND PELVIS CT WO AND W CONTRAST IV                                     | 72252-0 |          |      |          |
| CT PELVIS WITH + WITHOUT IV CONTRAST                             | CT PELVIS W AND WO IV CONTRAST                                                | 100 PELVIS CT WO AND W CONTRAST IV                                                          | 30616-7 | RPID47   |      | 1        |
|                                                                  |                                                                               | 87 SPLEEN CT WO AND W CONTRAST IV                                                           | 24989-6 |          |      |          |
|                                                                  |                                                                               | 87 PELVIS CT W CONTRAST IV                                                                  | 24866-6 | RPID48   |      |          |
|                                                                  |                                                                               | 87 PANCREAS CT WO AND W CONTRAST IV                                                         | 30614-2 |          |      |          |
|                                                                  |                                                                               | 85 LIVER CT WO AND W CONTRAST IV                                                            | 30612-6 |          |      |          |
| CT PELVIS WITH IV CONTRAST                                       | CT PELVIS W IV CONTRAST                                                       | 100 PELVIS CT W CONTRAST IV                                                                 | 24866-6 | RPID48   |      | 1        |
|                                                                  |                                                                               | 91 PELVIS CT WO CONTRAST                                                                    | 30615-9 | RPID46   |      |          |
|                                                                  |                                                                               | 87 PELVIS CT WO AND W CONTRAST IV                                                           | 30616-7 | RPID47   |      |          |
|                                                                  |                                                                               | 85 PELVIS CT LIMITED WO CONTRAST                                                            | 36108-9 |          |      |          |
|                                                                  |                                                                               | 85 PELVIS CT LIMITED W CONTRAST IV                                                          | 36998-2 |          |      |          |
| CT PELVIS WITHOUT IV CONTRAST                                    | CT PELVIS WO IV CONTRAST                                                      | 98 PELVIS CT W CONTRAST IV                                                                  | 24866-6 | RPID48   |      | 2        |
|                                                                  |                                                                               | 93 PELVIS CT WO CONTRAST                                                                    | 30615-9 | RPID46   |      |          |
|                                                                  |                                                                               | 89 PELVIS CT WO AND W CONTRAST IV                                                           | 30616-7 | RPID47   |      |          |
|                                                                  |                                                                               | 87 PELVIS CT LIMITED WO CONTRAST                                                            | 36108-9 |          |      |          |
|                                                                  |                                                                               | 84 PELVIS CT LIMITED W CONTRAST IV                                                          | 36998-2 |          |      |          |
| CT VIRTUAL COLONOSCOPY - SCREENING                               | CT VIRTUAL COLONOSCOPY - SCREENING                                            | 55 COLON AND RECTUM CT FOR SCREENING WO CONTRAST                                            | 79069-1 | RPID148  |      | 2        |
|                                                                  |                                                                               | 55 COLON AND RECTUM CT FOR SCREENING                                                        | 79101-2 | RPID86   |      |          |
|                                                                  |                                                                               | 49 SPLEEN CT WO CONTRAST                                                                    | 30621-7 |          |      |          |
|                                                                  |                                                                               | 48 COLON AND RECTUM CT WO CONTRAST                                                          | 79071-7 | RPID87   |      |          |
|                                                                  |                                                                               | 47 SPLEEN CT W CONTRAST IV                                                                  | 30622-5 |          |      |          |
| CT VIRTUAL COLONOSCOPY - DIAGNOSTIC                              | CT VIRTUAL COLONOSCOPY - DIAGNOSTIC                                           | 45 PANCREAS CT W CONTRAST IV                                                                | 24858-3 |          |      | 2.5      |
|                                                                  |                                                                               | 45 COLON AND RECTUM CT W CONTRAST IV                                                        | 79070-9 | RPID89   |      |          |
|                                                                  |                                                                               | 44 COLON AND RECTUM CT WO CONTRAST                                                          | 79071-7 | RPID87   |      |          |
|                                                                  |                                                                               | 43 PELVIS CT W CONTRAST IV                                                                  | 24866-6 | RPID48   |      |          |
|                                                                  |                                                                               | 43 CT GUIDANCE FOR BIOPSY OF PELVIS                                                         | 24864-1 |          |      |          |
