# Supplementary material for: Single-Center Experience Implementing the LOINC-RSNA Radiology Playbook for Adult Abdomen/Pelvis CT and MR Procedures Using a Semi-Automated Method
Source: Springer Nature journal article supplement (doi:10.1007/s10278-017-0016-0), 2017-08-25
Supplement: 10278_2017_16_MOESM2_ESM.pdf [file 10278_2017_16_MOESM2_ESM.pdf]

| Original Local Procedure Name                                                    | Modified Local Procedure Name, Token Sort Ratios                                 | LOINC-RSNA Radiology Playbook Procedure Names                   | LOINC #        | RPID #          | Rank | Category |
|----------------------------------------------------------------------------------|----------------------------------------------------------------------------------|-----------------------------------------------------------------|----------------|-----------------|------|----------|
| 3D RECONSTRUCTION ON SEPARATE WORKSTATION MR                                     | 3D RECONSTRUCTION ON SEPARATE WORKSTATION MR                                     |                                                                 |                |                 |      |          |
|                                                                                  |                                                                                  | 39 PROSTATE MR WO CONTRAST                                      | 36519-7        | RPID4832        |      | 0        |
|                                                                                  |                                                                                  | 37 PROSTATE MR WO AND W CONTRAST IV                             | 36389-5        |                 |      |          |
|                                                                                  |                                                                                  | 35 PROSTATE MR W CONTRAST IV                                    | 36244-2        | RPID5959        |      |          |
|                                                                                  |                                                                                  | 34 UTERUS MR WO CONTRAST                                        | 36542-9        |                 |      |          |
|                                                                                  |                                                                                  | 34 PANCREAS MR WO AND W CONTRAST IV                             | 36385-3        |                 |      |          |
| MRCP + MR ABDOMEN WITH + WITHOUT IV CONTRAST                                     | ABDOMEN MRCP AND MR ABDOMEN W AND WO IV CONTRAST                                 |                                                                 |                |                 |      |          |
|                                                                                  |                                                                                  | 79 CHEST AND ABDOMEN MR WO AND W CONTRAST IV                    | 36284-8        |                 |      | 3        |
|                                                                                  |                                                                                  | <b>78 ABDOMEN MR WO AND W CONTRAST IV</b>                       | <b>24557-1</b> | <b>RPID474</b>  |      |          |
|                                                                                  |                                                                                  | 76 ABDOMINAL AORTA MR WO AND W CONTRAST IV                      | 36273-1        |                 |      |          |
|                                                                                  |                                                                                  | <b>74 ABDOMEN MRCP WITH AND WITHOUT CONTRAST IV</b>             | <b>72248-8</b> |                 |      |          |
|                                                                                  |                                                                                  | 74 ABDOMEN AND PELVIS MR W CONTRAST PO AND WO AND W CONTRAST IV | 72246-2        |                 |      |          |
| MRCP + MR ABDOMEN WITHOUT IV CONTRAST                                            | ABDOMEN MRCP AND MR ABDOMEN WO IV CONTRAST                                       |                                                                 |                |                 |      | 0.5      |
|                                                                                  |                                                                                  | 82 ABDOMEN MR WO AND W CONTRAST IV                              | 24557-1        | RPID474         |      |          |
|                                                                                  |                                                                                  | 75 ABDOMEN MRCP WITH AND WITHOUT CONTRAST IV                    | 72248-8        |                 |      |          |
|                                                                                  |                                                                                  | 74 CHEST AND ABDOMEN MR W CONTRAST IV                           | 36942-1        |                 |      |          |
|                                                                                  |                                                                                  | 74 ABDOMINAL AORTA MR WO AND W CONTRAST IV                      | 36273-1        |                 |      |          |
|                                                                                  |                                                                                  | <b>73 ABDOMEN MRCP WO CONTRAST</b>                              | <b>58740-2</b> |                 |      |          |
| MRCP WITHOUT IV CONTRAST                                                         | ABDOMEN MRCP WO IV CONTRAST                                                      |                                                                 |                |                 |      | 1        |
|                                                                                  |                                                                                  | <b>94 ABDOMEN MRCP WO CONTRAST</b>                              | <b>58740-2</b> |                 |      |          |
|                                                                                  |                                                                                  | 94 ABDOMEN MR W CONTRAST IV                                     | 36134-5        | RPID475         |      |          |
|                                                                                  |                                                                                  | 90 ABDOMEN MR WO CONTRAST                                       | 30668-8        | RPID473         |      |          |
|                                                                                  |                                                                                  | 86 ABDOMEN MR WO AND W CONTRAST IV                              | 24557-1        | RPID474         |      |          |
|                                                                                  |                                                                                  | 79 CHEST AND ABDOMEN MR W CONTRAST IV                           | 36942-1        |                 |      |          |
| MR ABDOMEN WITH + WITHOUT IV CONTRAST + 3D LIVER RECON + CUT PLANES + SEG VOLUME | MR ABDOMEN W AND WO IV CONTRAST AND 3D LIVER RECON AND CUT PLANES AND SEG VOLUME |                                                                 |                |                 |      | 0        |
|                                                                                  |                                                                                  | 70 ABDOMEN AND PELVIS MR W CONTRAST PO AND WO AND W CONTRAST IV | 72246-2        |                 |      |          |
|                                                                                  |                                                                                  | 66 ABDOMEN AND PELVIS MR W CONTRAST PO AND WO CONTRAST IV       | 72247-0        |                 |      |          |
|                                                                                  |                                                                                  | 61 ABDOMINAL VESSELS MR ANGIOGRAM WO AND W CONTRAST IV          | 36855-5        | RPID457         |      |          |
|                                                                                  |                                                                                  | 60 CHEST AND ABDOMEN MR WO AND W CONTRAST IV                    | 36284-8        |                 |      |          |
|                                                                                  |                                                                                  | 60 BILIARY DUCTS AND PANCREATIC DUCT MR WO AND W CONTRAST IV    | 36944-7        |                 |      |          |
| MRI ABDOMEN W AND WO CONTRAST                                                    | MRI ABDOMEN W AND WO CONTRAST                                                    |                                                                 |                |                 |      | 1        |
|                                                                                  |                                                                                  | <b>93 ABDOMEN MR WO AND W CONTRAST IV</b>                       | <b>24557-1</b> | <b>RPID474</b>  |      |          |
|                                                                                  |                                                                                  | 86 ABDOMEN MR WO CONTRAST                                       | 30668-8        | RPID473         |      |          |
|                                                                                  |                                                                                  | 83 ABDOMEN MRCP WO CONTRAST                                     | 58740-2        |                 |      |          |
|                                                                                  |                                                                                  | 80 CHEST AND ABDOMEN MR WO AND W CONTRAST IV                    | 36284-8        |                 |      |          |
|                                                                                  |                                                                                  | 80 ABDOMEN MRCP WITH AND WITHOUT CONTRAST IV                    | 72248-8        |                 |      |          |
| MR ABDOMEN WITH IV CONTRAST                                                      | MR ABDOMEN W IV CONTRAST                                                         |                                                                 |                |                 |      | 1        |
|                                                                                  |                                                                                  | <b>100 ABDOMEN MR W CONTRAST IV</b>                             | <b>36134-5</b> | <b>RPID475</b>  |      |          |
|                                                                                  |                                                                                  | 91 ABDOMEN MR WO CONTRAST                                       | 30668-8        | RPID473         |      |          |
|                                                                                  |                                                                                  | 88 ABDOMEN MRCP WO CONTRAST                                     | 58740-2        |                 |      |          |
|                                                                                  |                                                                                  | 87 ABDOMEN MR WO AND W CONTRAST IV                              | 24557-1        | RPID474         |      |          |
|                                                                                  |                                                                                  | 83 CHEST AND ABDOMEN MR W CONTRAST IV                           | 36942-1        |                 |      |          |
| MR ABDOMEN WITHOUT IV CONTRAST                                                   | MR ABDOMEN WO IV CONTRAST                                                        |                                                                 |                |                 |      | 2        |
|                                                                                  |                                                                                  | 98 ABDOMEN MR W CONTRAST IV                                     | 36134-5        | RPID475         |      |          |
|                                                                                  |                                                                                  | <b>94 ABDOMEN MR WO CONTRAST</b>                                | <b>30668-8</b> | <b>RPID473</b>  |      |          |
|                                                                                  |                                                                                  | 90 ABDOMEN MRCP WO CONTRAST                                     | 58740-2        |                 |      |          |
|                                                                                  |                                                                                  | 89 ABDOMEN MR WO AND W CONTRAST IV                              | 24557-1        | RPID474         |      |          |
|                                                                                  |                                                                                  | 81 CHEST AND ABDOMEN MR W CONTRAST IV                           | 36942-1        |                 |      |          |
| MR ABDOMEN WITHOUT IV CONTRAST - RESEARCH                                        | MR ABDOMEN WO IV CONTRAST - RESEARCH                                             |                                                                 |                |                 |      | 4        |
|                                                                                  |                                                                                  | 83 ABDOMEN MR W CONTRAST IV                                     | 36134-5        | RPID475         |      |          |
|                                                                                  |                                                                                  | 80 ABDOMEN MR WO AND W CONTRAST IV                              | 24557-1        | RPID474         |      |          |
|                                                                                  |                                                                                  | 79 ABDOMEN MRCP WO CONTRAST                                     | 58740-2        |                 |      |          |
|                                                                                  |                                                                                  | <b>79 ABDOMEN MR WO CONTRAST</b>                                | <b>30668-8</b> | <b>RPID473</b>  |      |          |
|                                                                                  |                                                                                  | 73 PANCREAS MR WO AND W CONTRAST IV                             | 36385-3        |                 |      |          |
| MR ANGIOGRAPHY ABDOMEN WITH + WITHOUT IV CONTRAST                                | MR VESSELS ANGIOGRAM ABDOMEN W AND WO IV CONTRAST                                |                                                                 |                |                 |      | 1        |
|                                                                                  |                                                                                  | <b>96 ABDOMINAL VESSELS MR ANGIOGRAM WO AND W CONTRAST IV</b>   | <b>36855-5</b> | <b>RPID457</b>  |      |          |
|                                                                                  |                                                                                  | 90 ABDOMINAL VESSELS MR ANGIOGRAM W CONTRAST IV                 | 24533-2        |                 |      |          |
|                                                                                  |                                                                                  | 90 ABDOMINAL VEINS MR ANGIOGRAM WO AND W CONTRAST IV            | 36846-4        |                 |      |          |
|                                                                                  |                                                                                  | 88 ABDOMINAL VESSELS MR ANGIOGRAM WO CONTRAST                   | 36878-7        | RPID554         |      |          |
|                                                                                  |                                                                                  | 85 RENAL VESSELS MR ANGIOGRAM WO AND W CONTRAST IV              | 44134-5        |                 |      |          |
| MR ANGIOGRAPHY ABDOMEN WITH IV CONTRAST                                          | MR VESSELS ANGIOGRAM ABDOMEN W IV CONTRAST                                       |                                                                 |                |                 |      | 1        |
|                                                                                  |                                                                                  | 95 ABDOMINAL VESSELS MR ANGIOGRAM W CONTRAST IV                 | 24533-2        |                 |      |          |
|                                                                                  |                                                                                  | 90 ABDOMINAL VESSELS MR ANGIOGRAM WO CONTRAST                   | 36878-7        | RPID554         |      |          |
|                                                                                  |                                                                                  | 88 ABDOMINAL VESSELS MR ANGIOGRAM WO AND W CONTRAST IV          | 36855-5        | RPID457         |      |          |
|                                                                                  |                                                                                  | 83 RENAL VESSELS MR ANGIOGRAM WO AND W CONTRAST IV              | 44134-5        |                 |      |          |
|                                                                                  |                                                                                  | 83 RENAL VESSELS MR ANGIOGRAM W CONTRAST IV                     | 30887-4        |                 |      |          |
| MR ANGIOGRAPHY ABDOMEN WITHOUT IV CONTRAST                                       | MR VESSELS ANGIOGRAM ABDOMEN WO IV CONTRAST                                      |                                                                 |                |                 |      | 2        |
|                                                                                  |                                                                                  | 94 ABDOMINAL VESSELS MR ANGIOGRAM W CONTRAST IV                 | 24533-2        |                 |      |          |
|                                                                                  |                                                                                  | <b>92 ABDOMINAL VESSELS MR ANGIOGRAM WO CONTRAST</b>            | <b>36878-7</b> | <b>RPID554</b>  |      |          |
|                                                                                  |                                                                                  | 89 ABDOMINAL VESSELS MR ANGIOGRAM WO AND W CONTRAST IV          | 36855-5        | RPID457         |      |          |
|                                                                                  |                                                                                  | 84 RENAL VESSELS MR ANGIOGRAM WO AND W CONTRAST IV              | 44134-5        |                 |      |          |
|                                                                                  |                                                                                  | 84 PELVIS VESSELS MR ANGIOGRAM WO AND W CONTRAST IV             | 36863-9        | RPID469         |      |          |
| MR ANGIOGRAPHY LIVER ADV + VOL WITH + WITHOUT IV CONTRAST                        | MR VESSELS ANGIOGRAM LIVER ADV AND VOL W AND WO IV CONTRAST                      |                                                                 |                |                 |      | 0.5      |
|                                                                                  |                                                                                  | <b>84 ABDOMINAL VESSELS MR ANGIOGRAM WO AND W CONTRAST IV</b>   | <b>36855-5</b> | <b>RPID457</b>  |      |          |
|                                                                                  |                                                                                  | 79 RENAL VESSELS MR ANGIOGRAM WO AND W CONTRAST IV              | 44134-5        |                 |      |          |
|                                                                                  |                                                                                  | 77 PELVIS VESSELS MR ANGIOGRAM WO AND W CONTRAST IV             | 36863-9        | RPID469         |      |          |
|                                                                                  |                                                                                  | 76 ABDOMINAL VEINS MR ANGIOGRAM WO AND W CONTRAST IV            | 36846-4        |                 |      |          |
|                                                                                  |                                                                                  | 74 PELVIS VEINS MR ANGIOGRAM WO AND W CONTRAST IV               | 36854-8        |                 |      |          |
| MR ANGIOGRAPHY LIVER ADV WITH + WITHOUT IV CONTRAST                              | MR VESSELS ANGIOGRAM LIVER ADV W AND WO IV CONTRAST                              |                                                                 |                |                 |      | 0.5      |
|                                                                                  |                                                                                  | 86 RENAL VESSELS MR ANGIOGRAM WO AND W CONTRAST IV              | 44134-5        |                 |      |          |
|                                                                                  |                                                                                  | <b>86 ABDOMINAL VESSELS MR ANGIOGRAM WO AND W CONTRAST IV</b>   | <b>36855-5</b> | <b>RPID457</b>  |      |          |
|                                                                                  |                                                                                  | 83 PELVIS VESSELS MR ANGIOGRAM WO AND W CONTRAST IV             | 36863-9        | RPID469         |      |          |
|                                                                                  |                                                                                  | 80 ABDOMINAL VESSELS MR ANGIOGRAM W CONTRAST IV                 | 24533-2        |                 |      |          |
|                                                                                  |                                                                                  | 80 ABDOMINAL VEINS MR ANGIOGRAM WO AND W CONTRAST IV            | 36846-4        |                 |      |          |
| MR ANGIOGRAPHY PELVIS WITH + WITHOUT IV CONTRAST                                 | MR VESSELS ANGIOGRAM PELVIS W AND WO IV CONTRAST                                 |                                                                 |                |                 |      | 1        |
|                                                                                  |                                                                                  | <b>100 PELVIS VESSELS MR ANGIOGRAM WO AND W CONTRAST IV</b>     | <b>36863-9</b> | <b>RPID469</b>  |      |          |
|                                                                                  |                                                                                  | 94 PELVIS VEINS MR ANGIOGRAM WO AND W CONTRAST IV               | 36854-8        |                 |      |          |
|                                                                                  |                                                                                  | 93 RENAL VESSELS MR ANGIOGRAM WO AND W CONTRAST IV              | 44134-5        |                 |      |          |
|                                                                                  |                                                                                  | 92 PELVIS VESSELS MR ANGIOGRAM W CONTRAST IV                    | 24873-2        |                 |      |          |
|                                                                                  |                                                                                  | 90 PELVIS VESSELS MR ANGIOGRAM WO CONTRAST                      | 36883-7        | RPID5962        |      |          |
| MR ANGIOGRAPHY PELVIS WITHOUT IV CONTRAST                                        | MR VESSELS ANGIOGRAM PELVIS WO IV CONTRAST                                       |                                                                 |                |                 |      | 2        |
|                                                                                  |                                                                                  | 99 PELVIS VESSELS MR ANGIOGRAM W CONTRAST IV                    | 24873-2        |                 |      |          |
|                                                                                  |                                                                                  | <b>96 PELVIS VESSELS MR ANGIOGRAM WO CONTRAST</b>               | <b>36883-7</b> | <b>RPID5962</b> |      |          |
|                                                                                  |                                                                                  | 93 PELVIS VESSELS MR ANGIOGRAM WO AND W CONTRAST IV             | 36863-9        | RPID469         |      |          |
|                                                                                  |                                                                                  | 90 RENAL VESSELS MR ANGIOGRAM W CONTRAST IV                     | 30887-4        |                 |      |          |
|                                                                                  |                                                                                  | 88 RENAL VESSELS MR ANGIOGRAM WO CONTRAST                       | 44133-7        |                 |      |          |
| MR VENOGRAPHY ABDOMEN WITH + WITHOUT IV CONTRAST                                 | MR VEINS ANGIOGRAM ABDOMEN W AND WO IV CONTRAST                                  |                                                                 |                |                 |      | 1        |
|                                                                                  |                                                                                  | <b>96 ABDOMINAL VEINS MR ANGIOGRAM WO AND W CONTRAST IV</b>     | <b>36846-4</b> |                 |      |          |
|                                                                                  |                                                                                  | 90 ABDOMINAL VESSELS MR ANGIOGRAM WO AND W CONTRAST IV          | 36855-5        | RPID457         |      |          |
|                                                                                  |                                                                                  | 84 RENAL VEIN MR ANGIOGRAM WO AND W CONTRAST IV                 | 36415-8        |                 |      |          |
|                                                                                  |                                                                                  | 84 PELVIS VEINS MR ANGIOGRAM WO AND W CONTRAST IV               | 36854-8        |                 |      |          |
|                                                                                  |                                                                                  | 84 ABDOMINAL VESSELS MR ANGIOGRAM W CONTRAST IV                 | 24533-2        |                 |      |          |
| MR VENOGRAPHY ABDOMEN WITHOUT IV CONTRAST                                        | MR VEINS ANGIOGRAM ABDOMEN WO IV CONTRAST                                        |                                                                 |                |                 |      | 0        |
|                                                                                  |                                                                                  | 89 ABDOMINAL VEINS MR ANGIOGRAM WO AND W CONTRAST IV            | 36846-4        |                 |      |          |
|                                                                                  |                                                                                  | 87 ABDOMINAL VESSELS MR ANGIOGRAM W CONTRAST IV                 | 24533-2        |                 |      |          |
|                                                                                  |                                                                                  | 84 ABDOMINAL VESSELS MR ANGIOGRAM WO CONTRAST                   | 36878-7        | RPID554         |      |          |
|                                                                                  |                                                                                  | 83 PELVIS VEINS MR ANGIOGRAM WO AND W CONTRAST IV               | 36854-8        |                 |      |          |
|                                                                                  |                                                                                  | 83 ABDOMINAL VESSELS MR ANGIOGRAM WO AND W CONTRAST IV          | 36855-5        | RPID457         |      |          |
| MR VENOGRAPHY PELVIS WITH + WITHOUT IV CONTRAST                                  | MR VEINS ANGIOGRAM PELVIS W AND WO IV CONTRAST                                   |                                                                 |                |                 |      | 1        |
|                                                                                  |                                                                                  | <b>100 PELVIS VEINS MR ANGIOGRAM WO AND W CONTRAST IV</b>       | <b>36854-8</b> |                 |      |          |
|                                                                                  |                                                                                  | 94 PELVIS VESSELS MR ANGIOGRAM WO AND W CONTRAST IV             | 36863-9        | RPID469         |      |          |
|                                                                                  |                                                                                  | 91 RENAL VEIN MR ANGIOGRAM WO AND W CONTRAST IV                 | 36415-8        |                 |      |          |
|                                                                                  |                                                                                  | 90 PORTAL VEIN MR ANGIOGRAM WO AND W CONTRAST IV                | 36414-1        |                 |      |          |
|                                                                                  |                                                                                  | 86 RENAL VESSELS MR ANGIOGRAM WO AND W CONTRAST IV              | 44134-5        |                 |      |          |
| MR PELVIS WITH + WITHOUT IV CONTRAST                                             | MR PELVIS W AND WO IV CONTRAST                                                   |                                                                 |                |                 |      | 1        |
|                                                                                  |                                                                                  | <b>100 PELVIS MR WO AND W CONTRAST IV</b>                       | <b>30674-6</b> | <b>RPID566</b>  |      |          |
|                                                                                  |                                                                                  | 92 PELVIS AND HIP MR WO CONTRAST                                | 30671-2        |                 |      |          |
|                                                                                  |                                                                                  | 88 PELVIS AND HIP MR WO AND W CONTRAST IV                       | 30672-0        |                 |      |          |
|                                                                                  |                                                                                  | 87 UTERUS MR WO AND W CONTRAST IV                               | 36413-3        |                 |      |          |
|                                                                                  |                                                                                  | 87 SPLEEN MR WO AND W CONTRAST IV                               | 36404-2        |                 |      |          |
| MR PELVIS WITH IV CONTRAST                                                       | MR PELVIS W IV CONTRAST                                                          |                                                                 |                |                 |      | 1        |
|                                                                                  |                                                                                  | <b>100 PELVIS MR W CONTRAST IV</b>                              | <b>36237-6</b> | <b>RPID534</b>  |      |          |
|                                                                                  |                                                                                  | 91 PELVIS MR WO CONTRAST                                        | 30673-8        | RPID531         |      |          |
|                                                                                  |                                                                                  | 87 PELVIS MR WO AND W CONTRAST IV                               | 30674-5        | RPID566         |      |          |
|                                                                                  |                                                                                  | 85 PELVIS AND HIP MR WO CONTRAST                                | 30671-2        |                 |      |          |
|                                                                                  |                                                                                  | 83 UTERUS MR W CONTRAST IV                                      | 36265-7        |                 |      |          |
| MR PELVIS WITHOUT IV CONTRAST                                                    | MR PELVIS WO IV CONTRAST                                                         |                                                                 |                |                 |      | 2        |
|                                                                                  |                                                                                  | 98 PELVIS MR W CONTRAST IV                                      | 36237-6        | RPID534         |      |          |
|                                                                                  |                                                                                  | <b>93 PELVIS MR WO CONTRAST</b>                                 | <b>30673-8</b> | <b>RPID531</b>  |      |          |
|                                                                                  |                                                                                  | 89 PELVIS MR WO AND W CONTRAST IV                               | 30674-6        | RPID566         |      |          |
|                                                                                  |                                                                                  | 87 PELVIS AND HIP MR WO CONTRAST                                | 30671-2        |                 |      |          |
|                                                                                  |                                                                                  | 82 PANCREAS MR W CONTRAST IV                                    | 36236-8        |                 |      |          |
| MR PROSTATE WITH + WITHOUT IV CONTRAST                                           | MR PROSTATE W AND WO IV CONTRAST                                                 |                                                                 |                |                 |      | 1        |
|                                                                                  |                                                                                  | <b>100 PROSTATE MR WO AND W CONTRAST IV</b>                     | <b>36389-5</b> |                 |      |          |
|                                                                                  |                                                                                  | 88 PROSTATE MR W CONTRAST IV                                    | 36244-2        | RPID5959        |      |          |
|                                                                                  |                                                                                  | 84 UTERUS MR WO AND W CONTRAST IV                               | 36413-3        |                 |      |          |
|                                                                                  |                                                                                  | 84 SPLEEN MR WO AND W CONTRAST IV                               | 36404-2        |                 |      |          |
|                                                                                  |                                                                                  | 84 PROSTATE MR WO CONTRAST                                      | 36519-7        | RPID4832        |      |          |
| MRI ABDOMEN - PELVIS ENTEROGRAPHY W-WO CONTRAST                                  | MRI ABDOMEN - PELVIS SMALL BOWEL W-WO CONTRAST                                   |                                                                 |                |                 |      | 2        |
|                                                                                  |                                                                                  | 73 SMALL BOWEL MR W CONTRAST PO AND WO CONTRAST IV              | 80501-0        | RPID5963        |      |          |
|                                                                                  |                                                                                  | <b>70 SMALL BOWEL MR W CONTRAST PO AND WO AND W CONTRAST IV</b> | <b>80503-6</b> | <b>RPID645</b>  |      |          |
|                                                                                  |                                                                                  | 70 PELVIS MR WO AND W CONTRAST IV                               | 30674-6        | RPID566         |      |          |
|                                                                                  |                                                                                  | 68 ABDOMEN MRCP WO CONTRAST                                     | 58740-2        |                 |      |          |
|                                                                                  |                                                                                  | 67 PELVIS VESSELS MR ANGIOGRAM WO CONTRAST                      | 36883-7        | RPID5962        |      |          |
